# Supplementary material for: Physiological responses to ultra-high CO 2 levels in an evergreen tree species
Source: Copernicus journal article supplement (doi:10.5194/bg-22-5069-2025), 2025-09-29
Supplement: Supplementary file 1 [file bg-22-5069-2025-supplement.pdf]

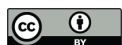

*Supplement of*

## **Physiological responses to ultra-high CO<sub>2</sub> levels in an evergreen tree species**

**Ben-El Levy et al.**

*Correspondence to:* Tamir Klein ([tamir.klein@weizmann.ac.il](mailto:tamir.klein@weizmann.ac.il))

The copyright of individual parts of the supplement might differ from the article licence.

## Supplementary Figures

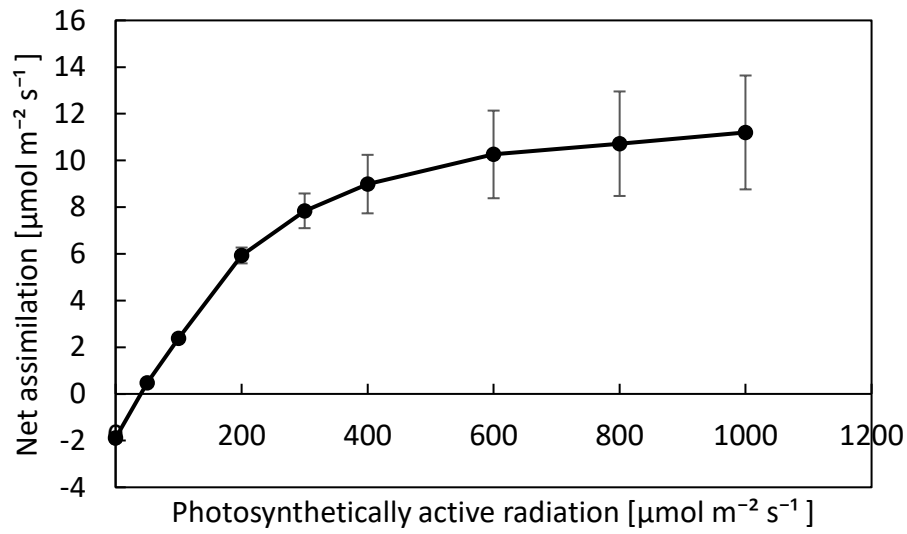

**Fig. S1. Light response curve of *Psidium cattleianum*.** Plants were exposed to increasing light levels and their net assimilation rate was measured. Error bars represent standard errors ( $n = 6$ ).

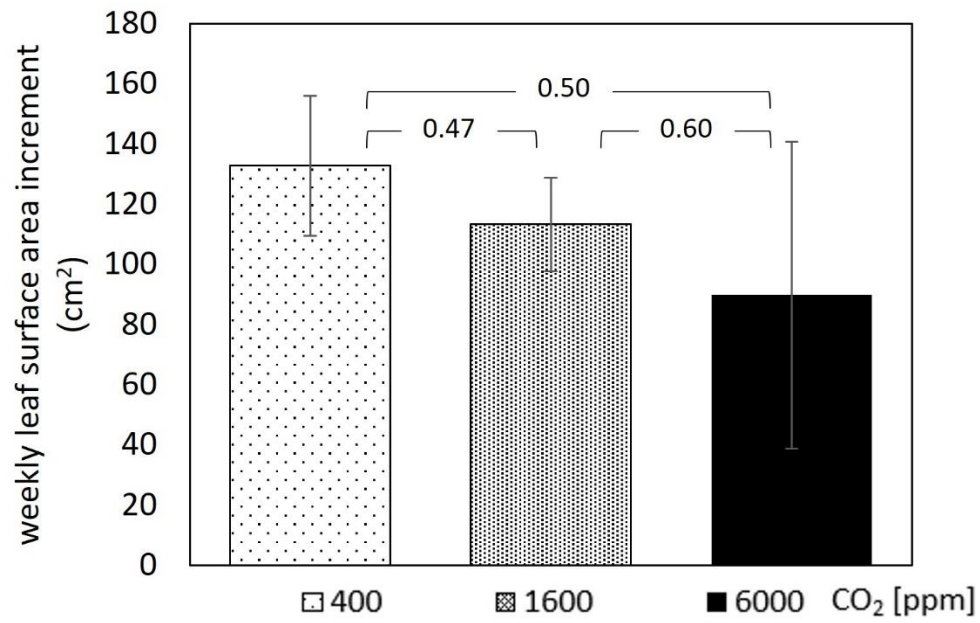

**Fig. S2. Leaf surface area increment is similar under different CO<sub>2</sub> concentrations.** Bar heights are means of 10 Guava saplings subjected to different CO<sub>2</sub> concentrations. Error bars represent standard errors. P-values are from paired t-tests.

11

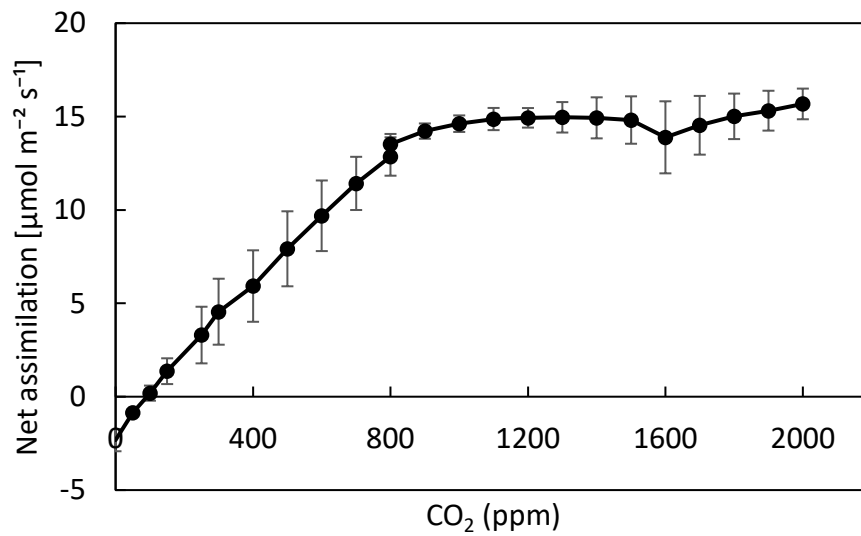

12

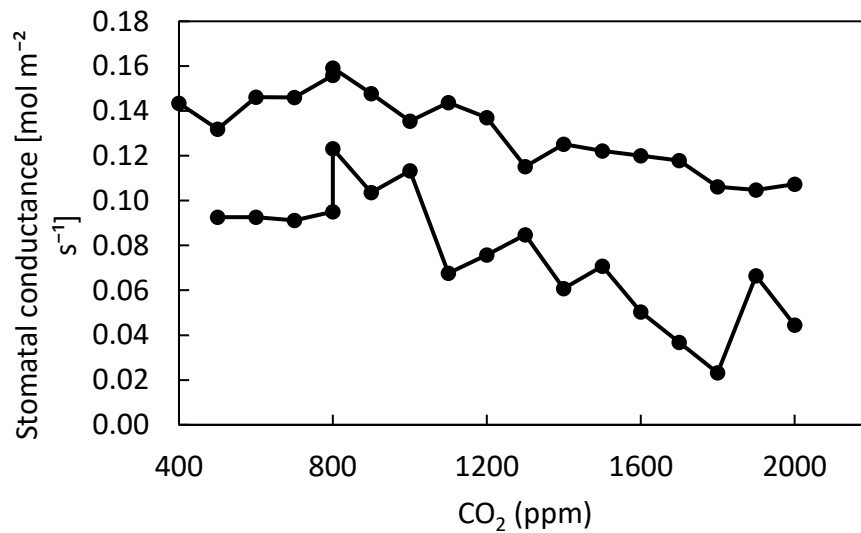

13

14

15

16

17

**Fig. S3. Leaf assimilation increases and stomatal conductance decreases under instantaneous exposure to elevated CO<sub>2</sub> concentrations.** Plants were grown under ambient CO<sub>2</sub> level and were exposed to increasing CO<sub>2</sub> concentrations using the IRGA chamber. Data points are means  $\pm$  SE of three plants (top) or measurements in two discrete plants (bottom).

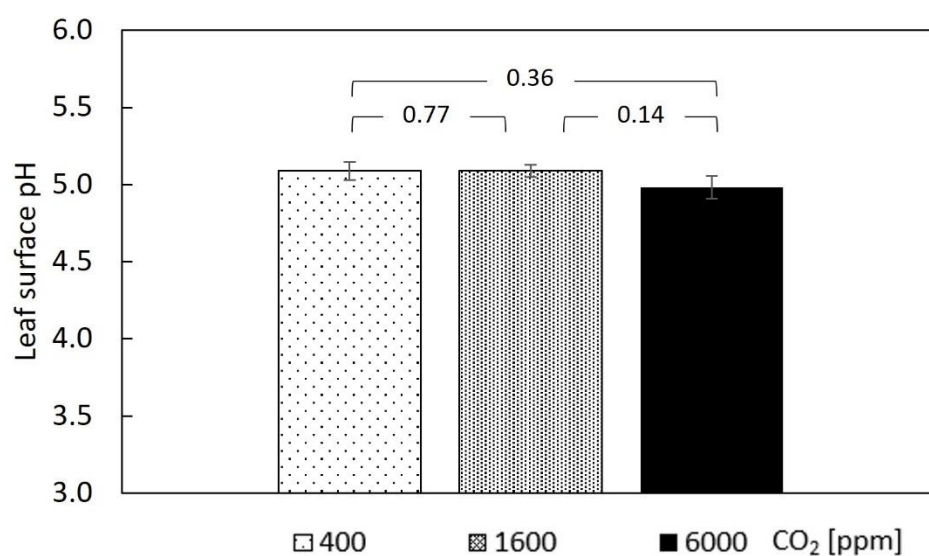

18  
 19 **Fig. S4 Leaf surface pH is similar under different CO<sub>2</sub> concentrations.** Data points are  
 20 means of 10 guava saplings subjected to different CO<sub>2</sub> concentrations. Error bars represent  
 21 standard errors. P-values are from paired t-tests.
